# Supplementary material for: Presence of a 34-gene signature is a favorable prognostic marker in squamous non-small cell lung carcinoma
Source: J Transl Med. 2020 Jul 3;18:271. doi: 10.1186/s12967-020-02436-3 (PMC7333331; doi:10.1186/s12967-020-02436-3)
Supplement: Supplementary file 1 — Additional file 1. NanoString gene panel. [file 12967_2020_2436_MOESM1_ESM.xlsx]

## Sheet: Heatmap_ordered_GeneList
ReverseOrder	entrezgene	ensembl_gene_id	hgnc_symbol	chromosome_name	start_position	end_position	Pathway
805	5266	ENSG00000124102	PI3	20	45174876	45176544	Cluster 1
804	3872	ENSG00000128422	KRT17	17	41619437	41624842	Cluster 1
803	8626	ENSG00000073282	TP63	3	189631416	189897279	Cluster 1
802	3861	ENSG00000186847	KRT14	17	41582279	41586921	Cluster 1
801	3852	ENSG00000186081	KRT5	12	52514575	52520687	Cluster 1
800	4102	ENSG00000221867	MAGEA3	X	152698752	152702347	Cluster 1
799	23532	ENSG00000185686	PRAME	22	22547701	22559361	Cluster 1
798	4103	ENSG00000147381	MAGEA4	X	151912509	151925170	Cluster 1
797	1485	ENSG00000184033	CTAG1B	X	154617609	154619282	Cluster 1
796	547	ENSG00000130294	KIF1A	2	240713764	240820308	Cluster 1
795	7345	ENSG00000154277	UCHL1	4	41256413	41268455	Cluster 1
794	10683	ENSG00000090932	DLL3	19	39498895	39508481	Cluster 1
793	55859	ENSG00000133169	BEX1	X	103062651	103064240	Cluster 1
792	114805	ENSG00000144278	GALNT13	2	153871913	154453849	Cluster 1
791	1000	ENSG00000170558	CDH2	18	27950966	28177446	Cluster 1
790	4684	ENSG00000149294	NCAM1	11	112961247	113278436	Cluster 1
789	3117	ENSG00000236418	HLA-DQA1	CHR_HSCHR6_MHC_DBB_CTG1	32606510	32628863	Cluster 1
788	10158	ENSG00000162366	PDZK1IP1	1	47183593	47191044	Cluster 1
787	3934	ENSG00000148346	LCN2	9	128149071	128153455	Cluster 1
786	4057	ENSG00000012223	LTF	3	46435645	46485234	Cluster 1
785	NA	NA	NA	NA	NA	NA	Cluster 1
784	2919	ENSG00000163739	CXCL1	4	73869393	73871242	Cluster 1
783	6364	ENSG00000115009	CCL20	2	227813842	227817564	Cluster 1
782	3569	ENSG00000136244	IL6	7	22725884	22732002	Cluster 1
781	6401	ENSG00000007908	SELE	1	169722641	169764705	Cluster 1
780	3036	ENSG00000105509	HAS1	19	51713112	51723994	Cluster 1
779	5743	ENSG00000073756	PTGS2	1	186671791	186680427	Cluster 1
778	112399	ENSG00000129521	EGLN3	14	33924231	34462774	Cluster 1
777	51129	ENSG00000167772	ANGPTL4	19	8363289	8374373	Cluster 1
776	8600	ENSG00000120659	TNFSF11	13	42562736	42608013	Cluster 1
775	3976	ENSG00000128342	LIF	22	30240447	30246851	Cluster 1
774	2921	ENSG00000163734	CXCL3	4	74036589	74038807	Cluster 1
773	11082	ENSG00000164283	ESM1	5	54977864	55022671	Cluster 1
772	8862	ENSG00000171388	APLN	X	129645259	129654937	Cluster 1
771	60675	ENSG00000163421	PROK2	3	71771656	71785206	Cluster 1
770	146225	ENSG00000140932	CMTM2	16	66579448	66588275	Cluster 1
769	374	ENSG00000109321	AREG	4	74445134	74455009	Cluster 1
768	2069	ENSG00000124882	EREG	4	74365143	74388751	Cluster 1
767	3169	ENSG00000129514	FOXA1	14	37589984	37596059	Cluster 1
766	3815	ENSG00000157404	KIT	4	54657918	54740715	Cluster 1
765	120224	ENSG00000151715	TMEM45B	11	129815819	129860003	Cluster 1
764	634	ENSG00000079385	CEACAM1	19	42507304	42561234	Cluster 1
763	2524	ENSG00000176920	FUT2	19	48695971	48705950	Cluster 1
762	4582	ENSG00000185499	MUC1	1	155185824	155192916	Cluster 1
761	79083	ENSG00000115648	MLPH	2	237485428	237555318	Cluster 1
760	6097	ENSG00000143365	RORC	1	151806071	151831872	Cluster 1
759	79098	ENSG00000182795	C1orf116	1	207018521	207032756	Cluster 1
758	1803	ENSG00000197635	DPP4	2	161992241	162074542	Cluster 1
757	54210	ENSG00000124731	TREM1	6	41267926	41286719	Cluster 1
756	8794	ENSG00000173535	TNFRSF10C	8	23084355	23117437	Cluster 1
755	5169	ENSG00000154269	ENPP3	6	131628442	131747418	Cluster 1
754	11148	ENSG00000114455	HHLA2	3	108296490	108378285	Cluster 1
753	6285	ENSG00000160307	S100B	21	46598962	46605208	Cluster 1
752	909	ENSG00000158477	CD1A	1	158254137	158258269	Cluster 1
751	50489	ENSG00000116031	CD207	2	70830214	70835822	Cluster 1
750	83888	ENSG00000137441	FGFBP2	4	15960243	15969309	Cluster 1
749	79679	ENSG00000134258	VTCN1	1	117143587	117210960	Cluster 1
748	6280	ENSG00000163220	S100A9	1	153357854	153361027	Cluster 1
747	6279	ENSG00000143546	S100A8	1	153390032	153391188	Cluster 1
746	NA	NA	NA	NA	NA	NA	Cluster 1
745	2261	ENSG00000068078	FGFR3	4	1793307	1808872	Cluster 1
744	3038	ENSG00000103044	HAS3	16	69105564	69118719	Cluster 1
743	1288	ENSG00000197565	COL4A6	X	108155607	108439497	Cluster 1
742	3084	ENSG00000157168	NRG1	8	31639386	32767959	Cluster 1
741	7474	ENSG00000114251	WNT5A	3	55465715	55490539	Cluster 1
740	57007	ENSG00000144476	ACKR3	2	236567787	236582358	Cluster 1
739	182	ENSG00000101384	JAG1	20	10637684	10674107	Cluster 1
738	3655	ENSG00000091409	ITGA6	2	172427354	172506282	Cluster 1
737	55612	ENSG00000101311	FERMT1	20	6074845	6123544	Cluster 1
736	7161	ENSG00000078900	TP73	1	3652520	3736201	Cluster 1
735	10278	ENSG00000100842	EFS	14	23356402	23365752	Cluster 1
734	2263	ENSG00000066468	FGFR2	10	121478334	121598458	Cluster 1
733	80328	ENSG00000131015	ULBP2	6	149942000	149949235	Cluster 1
732	27113	ENSG00000105327	BBC3	19	47220822	47232766	Cluster 1
731	1030	ENSG00000147883	CDKN2B	9	22002903	22009363	Cluster 1
730	1029	ENSG00000147889	CDKN2A	9	21967753	21995301	Cluster 1
729	6422	ENSG00000104332	SFRP1	8	41261958	41309497	Cluster 1
728	4288	ENSG00000148773	MKI67	10	128096659	128126385	Cluster 2
727	891	ENSG00000134057	CCNB1	5	69167010	69178245	Cluster 2
726	29089	ENSG00000077152	UBE2T	1	202331657	202341980	Cluster 2
725	1894	ENSG00000114346	ECT2	3	172750682	172821474	Cluster 2
724	23594	ENSG00000091651	ORC6	16	46689643	46698394	Cluster 2
723	9837	ENSG00000101003	GINS1	20	25407727	25452628	Cluster 2
722	10635	ENSG00000111247	RAD51AP1	12	4538798	4560048	Cluster 2
721	990	ENSG00000094804	CDC6	17	40287633	40304657	Cluster 2
720	7298	ENSG00000176890	TYMS	18	657604	673578	Cluster 2
719	6241	ENSG00000171848	RRM2	2	10120698	10131419	Cluster 2
718	51514	ENSG00000143476	DTL	1	212035553	212107400	Cluster 2
717	83540	ENSG00000143228	NUF2	1	163266576	163355764	Cluster 2
716	9156	ENSG00000174371	EXO1	1	241847967	241895148	Cluster 2
715	332	ENSG00000089685	BIRC5	17	78214186	78225636	Cluster 2
714	1063	ENSG00000117724	CENPF	1	214603195	214664588	Cluster 2
713	7153	ENSG00000131747	TOP2A	17	40388516	40417950	Cluster 2
712	4605	ENSG00000101057	MYBL2	20	43667019	43716496	Cluster 2
711	11004	ENSG00000142945	KIF2C	1	44739818	44767767	Cluster 2
710	991	ENSG00000117399	CDC20	1	43358955	43363203	Cluster 2
709	9833	ENSG00000165304	MELK	9	36572862	36677683	Cluster 2
708	10403	ENSG00000080986	NDC80	18	2571511	2616635	Cluster 2
707	NA	NA	NA	NA	NA	NA	Cluster 2
706	54443	ENSG00000011426	ANLN	7	36389806	36453791	Cluster 2
705	11065	ENSG00000175063	UBE2C	20	45812576	45816957	Cluster 2
704	55165	ENSG00000138180	CEP55	10	93496632	93529092	Cluster 2
703	898	ENSG00000105173	CCNE1	19	29811898	29824308	Cluster 2
702	26271	ENSG00000112029	FBXO5	6	152970519	152983579	Cluster 2
701	2146	ENSG00000106462	EZH2	7	148807383	148884321	Cluster 2
700	64105	ENSG00000123219	CENPK	5	65517766	65563171	Cluster 2
699	9232	ENSG00000164611	PTTG1	5	160421822	160428744	Cluster 2
698	3925	ENSG00000117632	STMN1	1	25884181	25906991	Cluster 2
697	83990	ENSG00000136492	BRIP1	17	61681266	61863521	Cluster 2
696	195828	ENSG00000165244	ZNF367	9	96385941	96418329	Cluster 2
695	8836	ENSG00000137563	GGH	8	63015079	63039171	Cluster 2
694	3161	ENSG00000072571	HMMR	5	163460203	163491945	Cluster 2
693	NA	NA	NA	NA	NA	NA	Cluster 2
692	NA	NA	NA	NA	NA	NA	Cluster 2
691	4038	ENSG00000134569	LRP4	11	46856868	46918642	Cluster 2
690	23462	ENSG00000164683	HEY1	8	79764010	79767863	Cluster 2
689	26227	ENSG00000092621	PHGDH	1	119648411	119744226	Cluster 2
688	144455	ENSG00000165891	E2F7	12	77021247	77065580	Cluster 2
687	4843	ENSG00000007171	NOS2	17	27756766	27800499	Cluster 2
686	4745	ENSG00000165973	NELL1	11	20669551	21575681
685	4137	ENSG00000276155	MAPT	CHR_HSCHR17_1_CTG5	46069784	46203150
684	55540	ENSG00000056736	IL17RB	3	53846580	53865800
683	2264	ENSG00000160867	FGFR4	5	177086886	177098144
682	2066	ENSG00000178568	ERBB4	2	211375717	212538841
681	534	ENSG00000227587	ATP6V1G2	CHR_HSCHR6_MHC_COX_CTG1	31531911	31534293
680	57565	ENSG00000197705	KLHL14	18	32672671	32773062
679	22919	ENSG00000101367	MAPRE1	20	32819893	32850405
678	10728	ENSG00000110958	PTGES3	12	56663341	56688408
677	3146	ENSG00000189403	HMGB1	13	30456704	30617597
676	2885	ENSG00000177885	GRB2	17	75318076	75405709
675	5604	ENSG00000169032	MAP2K1	15	66386817	66492312
674	6389	ENSG00000073578	SDHA	5	218241	256700
673	2932	ENSG00000082701	GSK3B	3	119821323	120094417
672	2033	ENSG00000100393	EP300	22	41091786	41180079
671	673	ENSG00000157764	BRAF	7	140719327	140924764
670	4763	ENSG00000196712	NF1	17	31094927	31382116
669	2475	ENSG00000198793	MTOR	1	11106535	11262507
668	5393	ENSG00000123737	EXOSC9	4	121801317	121817021
667	6908	ENSG00000112592	TBP	6	170554302	170572870
666	7090	ENSG00000140332	TLE3	15	70047790	70098176
665	208	ENSG00000105221	AKT2	19	40230317	40285536
664	5395	ENSG00000122512	PMS2	7	5973239	6009125
663	6597	ENSG00000127616	SMARCA4	19	10961001	11065395
662	7270	ENSG00000125482	TTF1	9	132375548	132406851
661	10959	ENSG00000086598	TMED2	12	123584531	123598577
660	5281	ENSG00000151665	PIGF	2	46580937	46617119
659	8533	ENSG00000141030	COPS3	17	17246820	17281293
658	3320	ENSG00000080824	HSP90AA1	14	102080738	102139699
657	5599	ENSG00000107643	MAPK8	10	48306639	48439360
656	25800	ENSG00000141424	SLC39A6	18	36108532	36129385
655	51605	ENSG00000089195	TRMT6	20	5937235	5950558
654	55103	ENSG00000116191	RALGPS2	1	178725147	178921841
653	7157	ENSG00000141510	TP53	17	7661779	7687550
652	7150	ENSG00000198900	TOP1	20	41028818	41124487
651	1499	ENSG00000168036	CTNNB1	3	41194837	41260096
650	4430	ENSG00000128641	MYO1B	2	191245185	191425389
649	3091	ENSG00000100644	HIF1A	14	61695513	61748259
648	8460	ENSG00000169902	TPST1	7	66205199	66420543
647	3688	ENSG00000150093	ITGB1	10	32900319	33005792
646	80381	ENSG00000103855	CD276	15	73683966	73714518
645	23597	ENSG00000123130	ACOT9	X	23702253	23766475
644	2120	ENSG00000139083	ETV6	12	11649854	11895402
643	6774	ENSG00000168610	STAT3	17	42313324	42388568
642	581	ENSG00000087088	BAX	19	48954815	48961798
641	29855	ENSG00000118900	UBN1	16	4846665	4882360
640	1642	ENSG00000167986	DDB1	11	61299451	61342596
639	7248	ENSG00000165699	TSC1	9	132891348	132944633
638	5605	ENSG00000126934	MAP2K2	19	4090321	4124129
637	4292	ENSG00000076242	MLH1	3	36993332	37050918
636	54583	ENSG00000135766	EGLN1	1	231363751	231425044
635	207	ENSG00000142208	AKT1	14	104769349	104795751
634	578	ENSG00000030110	BAK1	6	33572547	33580293
633	NA	NA	NA	NA	NA	NA
632	836	ENSG00000164305	CASP3	4	184627696	184649509
631	10018	ENSG00000153094	BCL2L11	2	111119378	111168447
630	6782	ENSG00000155304	HSPA13	21	14371115	14383484
629	3703	ENSG00000134910	STT3A	11	125591712	125625215
628	811	ENSG00000179218	CALR	19	12938578	12944489
627	604	ENSG00000113916	BCL6	3	187721377	187745727
626	92610	ENSG00000145365	TIFA	4	112274542	112285903
625	8754	ENSG00000282230	ADAM9	CHR_HSCHR8_9_CTG1	39101863	39105144
624	NA	NA	NA	NA	NA	NA
623	3945	ENSG00000111716	LDHB	12	21635342	21757857
622	3845	ENSG00000133703	KRAS	12	25204789	25250936
621	23035	ENSG00000040199	PHLPP2	16	71637835	71724701
620	65244	ENSG00000123352	SPATS2	12	49366584	49527424
619	6602	ENSG00000066117	SMARCD1	12	50084972	50100712
618	NA	NA	NA	NA	NA	NA
617	NA	NA	NA	NA	NA	NA
616	57180	ENSG00000133627	ACTR3B	7	152759749	152855378
615	65108	ENSG00000175130	MARCKSL1	1	32333832	32336379
614	1719	ENSG00000228716	DHFR	5	80626228	80654983
613	10712	ENSG00000160767	FAM189B	1	155247205	155255483
612	23401	ENSG00000181274	FRAT2	10	97332497	97334709
611	80142	ENSG00000148334	PTGES2	9	128120693	128128462
610	572	ENSG00000002330	BAD	11	64269830	64284704
609	90809	ENSG00000165782	TMEM55B	14	20457719	20461612
608	3661	ENSG00000126456	IRF3	19	49659569	49665875
607	26276	ENSG00000184056	VPS33B	15	90998416	91022603
606	6668	ENSG00000167182	SP2	17	47896150	47928957
605	948	ENSG00000135218	CD36	7	80369575	80679277
604	637	ENSG00000015475	BID	22	17734138	17774770
603	4005	ENSG00000135363	LMO2	11	33858576	33892289
602	1051	ENSG00000172216	CEBPB	20	50190734	50192689
601	3566	ENSG00000077238	IL4R	16	27313668	27364778
600	4790	ENSG00000109320	NFKB1	4	102501329	102617302
599	4791	ENSG00000077150	NFKB2	10	102394110	102402529
598	8797	ENSG00000104689	TNFRSF10A	8	23190452	23225126
597	54961	ENSG00000172830	SSH3	11	67303448	67312607
596	1890	ENSG00000025708	TYMP	22	50525752	50530056
595	602	ENSG00000069399	BCL3	19	44747705	44760044
594	7494	ENSG00000100219	XBP1	22	28794555	28800597
593	55840	ENSG00000145088	EAF2	3	121835183	121886526
592	29760	ENSG00000095585	BLNK	10	96191702	96271587
591	10633	ENSG00000100276	RASL10A	22	29312933	29319679
590	57699	ENSG00000124772	CPNE5	6	36740775	36840002
589	NA	NA	NA	NA	NA	NA
588	8660	ENSG00000185950	IRS2	13	109752698	109786568
587	25794	ENSG00000186765	FSCN2	17	81528396	81537130
586	999	ENSG00000039068	CDH1	16	68737225	68835548
585	55930	ENSG00000128833	MYO5C	15	52192322	52295798
584	2065	ENSG00000065361	ERBB3	12	56079857	56103505
583	4072	ENSG00000119888	EPCAM	2	47345158	47387601
582	2064	ENSG00000141736	ERBB2	17	39687914	39730426
581	2886	ENSG00000141738	GRB7	17	39737927	39747291
580	26996	ENSG00000173890	GPR160	3	170037929	170085403
579	6297	ENSG00000165821	SALL2	14	21521081	21537216
578	6490	ENSG00000185664	PMEL	12	55954105	55973317
577	100133941	ENSG00000272398	CD24	6	106969831	106975627
576	6271	ENSG00000160678	S100A1	1	153627926	153632039
575	54474	ENSG00000263057	KRT20	CHR_HSCHR17_4_CTG4	40875941	40885227
574	2735	ENSG00000111087	GLI1	12	57460135	57472262
573	NA	NA	NA	NA	NA	NA
572	5644	ENSG00000274247	PRSS1	CHR_HSCHR7_2_CTG6	142790185	142793793	Cluster 3
571	1088	ENSG00000124469	CEACAM8	19	42580241	42595055	Cluster 3
570	1045	ENSG00000165556	CDX2	13	27962137	27971139	Cluster 3
569	9892	ENSG00000065609	SNAP91	6	83552880	83709691	Cluster 3
568	383	ENSG00000118520	ARG1	6	131573144	131584332	Cluster 3
567	1232	ENSG00000183625	CCR3	3	46163604	46266706	Cluster 3
566	5368	ENSG00000168081	PNOC	8	28316986	28343355	Cluster 3
565	NA	NA	NA	NA	NA	NA	Cluster 3
564	100132285	ENSG00000276139	KIR2DS2	CHR_HSCHR19KIR_G085_BA1_HAP_CTG3_1	54738560	54752721	Cluster 3
563	3804	ENSG00000275623	KIR2DL3	CHR_HSCHR19KIR_G248_A_HAP_CTG3_1	54738461	54752744	Cluster 3
562	51162	ENSG00000172889	EGFL7	9	136658856	136672678	Cluster 3
561	149233	ENSG00000162594	IL23R	1	67138907	67259979	Cluster 3
560	140691	ENSG00000185880	TRIM69	15	44728988	44767829	Cluster 3
559	246778	ENSG00000197272	IL27	16	28499362	28512051	Cluster 3
558	3605	ENSG00000112115	IL17A	6	52186387	52190638	Cluster 3
557	1440	ENSG00000108342	CSF3	17	40015361	40017813	Cluster 3
556	1178	ENSG00000105205	CLC	19	39731250	39738028	Cluster 3
555	3811	ENSG00000274146	KIR3DL1	CHR_HSCHR19KIR_G085_BA1_HAP_CTG3_1	54802891	54817199	Cluster 3
554	3596	ENSG00000169194	IL13	5	132656263	132661110	Cluster 3
553	5322	ENSG00000127472	PLA2G5	1	20028179	20091190	Cluster 3
552	3570	ENSG00000160712	IL6R	1	154405193	154469450	Cluster 3
551	11126	ENSG00000117281	CD160	1	145719471	145739288	Cluster 3
550	27190	ENSG00000127743	IL17B	5	149371324	149404202	Cluster 3
549	327657	ENSG00000170054	SERPINA9	14	94462717	94479689	Cluster 3
548	3558	ENSG00000109471	IL2	4	122451470	122456725	Cluster 3
547	NA	NA	NA	NA	NA	NA	Cluster 3
546	84824	ENSG00000132185	FCRLA	1	161706972	161714352	Cluster 3
545	4250	ENSG00000110484	SCGB2A2	11	62270155	62273156	Cluster 3
544	3567	ENSG00000113525	IL5	5	132541444	132556838	Cluster 3
543	50616	ENSG00000127318	IL22	12	68248242	68253607	Cluster 3
542	112744	ENSG00000112116	IL17F	6	52236681	52244537	Cluster 3
541	3562	ENSG00000164399	IL3	5	132060529	132063204	Cluster 3
540	3578	ENSG00000145839	IL9	5	135892246	135895827	Cluster 3
539	386653	ENSG00000204671	IL31	12	122172030	122174199	Cluster 3
538	2315	ENSG00000120215	MLANA	9	5890802	5910606	Cluster 3
537	3565	ENSG00000113520	IL4	5	132673986	132682676	Cluster 3
536	998	ENSG00000070831	CDC42	1	22052627	22092946
535	102	ENSG00000137845	ADAM10	15	58588807	58749978
534	284996	ENSG00000163162	RNF149	2	101271219	101308701
533	5728	ENSG00000171862	PTEN	10	87863113	87971930
532	23174	ENSG00000140948	ZCCHC14	16	87406246	87492045
531	5770	ENSG00000196396	PTPN1	20	50510321	50585241
530	6397	ENSG00000129657	SEC14L1	17	77086716	77217101
529	4193	ENSG00000135679	MDM2	12	68808176	68850686
528	79768	ENSG00000134152	KATNBL1	15	34140674	34210096
527	56990	ENSG00000158985	CDC42SE2	5	131245493	131398447
526	51752	ENSG00000164307	ERAP1	5	96760810	96808100
525	94039	ENSG00000181896	ZNF101	19	19668796	19683509
524	51101	ENSG00000104427	ZC2HC1A	8	78666047	78719765
523	3725	ENSG00000177606	JUN	1	58780788	58784327
522	9467	ENSG00000131370	SH3BP5	3	15254853	15341368
521	961	ENSG00000196776	CD47	3	108043298	108091025
520	5141	ENSG00000065989	PDE4A	19	10416773	10469631
519	2744	ENSG00000115419	GLS	2	190880827	190965552
518	10982	ENSG00000166974	MAPRE2	18	34976928	35143470
517	64375	ENSG00000123411	IKZF4	12	56007659	56038435
516	29106	ENSG00000104112	SCG3	15	51681353	51721031
515	113263	ENSG00000106415	GLCCI1	7	7968794	8094272
514	54020	ENSG00000160190	SLC37A1	21	42496008	42581440
513	9	ENSG00000171428	NAT1	8	18170477	18223689
512	8821	ENSG00000109452	INPP4B	4	142023160	142847432
511	7422	ENSG00000112715	VEGFA	6	43770184	43786487
510	2321	ENSG00000102755	FLT1	13	28300344	28495145
509	285	ENSG00000091879	ANGPT2	8	6499651	6563409
508	22836	ENSG00000164292	RHOBTB3	5	95713522	95824383
507	4603	ENSG00000185697	MYBL1	8	66562175	66614247
506	1289	ENSG00000130635	COL5A1	9	134641774	134844843
505	4313	ENSG00000087245	MMP2	16	55389700	55506691
504	1462	ENSG00000038427	VCAN	5	83471465	83582303
503	2191	ENSG00000078098	FAP	2	162170684	162245151
502	1295	ENSG00000144810	COL8A1	3	99638475	99799226
501	2335	ENSG00000115414	FN1	2	215360440	215436172
500	800	ENSG00000122786	CALD1	7	134744252	134970728
499	7424	ENSG00000150630	VEGFC	4	176683538	176792727
498	27286	ENSG00000102359	SRPX2	X	100644166	100675788
497	7076	ENSG00000102265	TIMP1	X	47582313	47586789
496	55365	ENSG00000002933	TMEM176A	7	150800403	150805120
495	683	ENSG00000109743	BST1	4	15702950	15738313
494	6387	ENSG00000107562	CXCL12	10	44370165	44386493
493	1545	ENSG00000138061	CYP1B1	2	38066973	38109902
492	7412	ENSG00000162692	VCAM1	1	100719742	100739045
491	7292	ENSG00000117586	TNFSF4	1	173183734	173207313
490	9734	ENSG00000048052	HDAC9	7	18086949	19002416
489	290	ENSG00000166825	ANPEP	15	89784889	89815401
488	595	ENSG00000110092	CCND1	11	69641087	69654474
487	3958	ENSG00000131981	LGALS3	14	55124110	55145413
486	255488	ENSG00000137393	RNF144B	6	18387350	18468874
485	22807	ENSG00000030419	IKZF2	2	212999691	213152427
484	7100	ENSG00000187554	TLR5	1	223109406	223143282
483	573	ENSG00000107262	BAG1	9	33247820	33264720
482	259173	ENSG00000178038	ALS2CL	3	46668997	46693704
481	55240	ENSG00000115107	STEAP3	2	119223831	119265652
480	8792	ENSG00000141655	TNFRSF11A	18	62325287	62391292
479	23220	ENSG00000110042	DTX4	11	59171430	59208587
478	2526	ENSG00000196371	FUT4	11	94543840	94549898
477	3268	ENSG00000106351	AGFG2	7	100539211	100568219
476	100507436	ENSG00000233051	MICA	CHR_HSCHR6_MHC_COX_CTG1	31390270	31406729
475	4277	ENSG00000231179	MICB	CHR_HSCHR6_MHC_APD_CTG1	31561856	31578081
474	4853	ENSG00000134250	NOTCH2	1	119911553	120069626
473	861	ENSG00000159216	RUNX1	21	34787801	36004667
472	10392	ENSG00000106100	NOD1	7	30424527	30478784
471	1912	ENSG00000134686	PHC2	1	33323623	33431052
470	2530	ENSG00000033170	FUT8	14	65410592	65744121
469	114884	ENSG00000144645	OSBPL10	3	31657890	32077580
468	3092	ENSG00000127946	HIP1	7	75533300	75738962
467	644	ENSG00000106605	BLVRA	7	43758680	43807342
466	598	ENSG00000171552	BCL2L1	20	31664452	31723989
465	NA	NA	NA	NA	NA	NA
464	3716	ENSG00000162434	JAK1	1	64833229	64966504
463	841	ENSG00000064012	CASP8	2	201233443	201287711
462	6778	ENSG00000166888	STAT6	12	57095408	57132139
461	79961	ENSG00000162777	DENND2D	1	111187174	111204535
460	10379	ENSG00000213928	IRF9	14	24161053	24166565
459	9854	ENSG00000172375	C2CD2L	11	119102198	119118544
458	2990	ENSG00000169919	GUSB	7	65960684	65982314
457	7249	ENSG00000103197	TSC2	16	2047465	2088720
456	90427	ENSG00000104081	BMF	15	40087890	40108892
455	55501	ENSG00000136213	CHST12	7	2403560	2448483
454	54567	ENSG00000128917	DLL4	15	40929340	40939072
453	1003	ENSG00000179776	CDH5	16	66366622	66404786
452	947	ENSG00000174059	CD34	1	207880972	207911402
451	51523	ENSG00000171604	CXXC5	5	139647299	139683882
450	3665	ENSG00000185507	IRF7	11	612553	615999
449	10783	ENSG00000119408	NEK6	9	124257606	124353307
448	9961	ENSG00000013364	MVP	16	29820394	29848039
447	6892	ENSG00000231925	TAPBP	6	33299694	33314387
446	22898	ENSG00000105339	DENND3	8	141117278	141195808
445	2246	ENSG00000113578	FGF1	5	142592178	142698070
444	3667	ENSG00000169047	IRS1	2	226731317	226799759
443	3690	ENSG00000259207	ITGB3	17	47253846	47311816
442	56937	ENSG00000124225	PMEPA1	20	57648392	57711536
441	5159	ENSG00000113721	PDGFRB	5	150113837	150155872
440	4035	ENSG00000123384	LRP1	12	57128493	57213351
439	10398	ENSG00000101335	MYL9	20	36541484	36551447
438	3912	ENSG00000091136	LAMB1	7	107923799	108003255
437	2615	ENSG00000137507	LRRC32	11	76657524	76670747
436	27122	ENSG00000050165	DKK3	11	11963106	12009769
435	953	ENSG00000138185	ENTPD1	10	95711779	95869695
434	8522	ENSG00000007237	GAS7	17	9910609	10198551
433	4681	ENSG00000158747	NBL1	1	19640554	19658456
432	6935	ENSG00000148516	ZEB1	10	31318495	31529814
431	775	ENSG00000151067	CACNA1C	12	1970786	2697950
430	4837	ENSG00000166741	NNMT	11	114257787	114313285
429	7057	ENSG00000137801	THBS1	15	39581079	39599466
428	29995	ENSG00000071282	LMCD1	3	8501707	8574673
427	1490	ENSG00000118523	CTGF	6	131948176	131951373
426	2621	ENSG00000183087	GAS6	13	113820549	113864067
425	54587	ENSG00000162576	MXRA8	1	1352689	1361777
424	4921	ENSG00000162733	DDR2	1	162631373	162787400
423	5156	ENSG00000134853	PDGFRA	4	54229097	54298247
422	6876	ENSG00000149591	TAGLN	11	117199321	117204782
421	633	ENSG00000182492	BGN	X	153494939	153509554
420	4323	ENSG00000157227	MMP14	14	22836557	22849027
419	23022	ENSG00000129116	PALLD	4	168497066	168928457
418	56975	ENSG00000177706	FAM20C	7	192969	260745
417	7431	ENSG00000026025	VIM	10	17228259	17237593
416	3956	ENSG00000100097	LGALS1	22	37675608	37679806
415	4162	ENSG00000076706	MCAM	11	119308529	119321521
414	NA	NA	NA	NA	NA	NA
413	57124	ENSG00000174807	CD248	11	66314487	66317044
412	22795	ENSG00000087303	NID2	14	52004803	52069228
411	5118	ENSG00000106333	PCOLCE	7	100602177	100608175
410	3910	ENSG00000112769	LAMA4	6	112108760	112254939
409	2149	ENSG00000181104	F2R	5	76716043	76735781
408	7046	ENSG00000106799	TGFBR1	9	99104038	99154192
407	1282	ENSG00000187498	COL4A1	13	110148963	110307149
406	1284	ENSG00000134871	COL4A2	13	110305812	110513027
405	6376	ENSG00000006210	CX3CL1	16	57372458	57385048
404	3791	ENSG00000128052	KDR	4	55078477	55125589
403	9936	ENSG00000241399	CD302	2	159768630	159798255
402	3082	ENSG00000019991	HGF	7	81699006	81770438
401	9760	ENSG00000198846	TOX	8	58805418	59119208
400	2353	ENSG00000170345	FOS	14	75278774	75282230
399	284	ENSG00000154188	ANGPT1	8	107249482	107498055
398	10395	ENSG00000164741	DLC1	8	13083361	13604610
397	26508	ENSG00000163909	HEYL	1	39624153	39639945
396	1191	ENSG00000120885	CLU	8	27596917	27615031
395	9173	ENSG00000115602	IL1RL1	2	102311502	102352037
394	27254	ENSG00000172346	CSDC2	22	41560763	41577741
393	5241	ENSG00000082175	PGR	11	101029624	101130524
392	56477	ENSG00000151882	CCL28	5	43376645	43412391
391	6362	ENSG00000278167	CCL18	CHR_HSCHR17_7_CTG4	36064636	36072388
390	6355	ENSG00000108700	CCL8	17	34319036	34321402
389	4316	ENSG00000137673	MMP7	11	102520508	102530753
388	4283	ENSG00000138755	CXCL9	4	76001275	76007488
387	3627	ENSG00000169245	CXCL10	4	76021117	76023497
386	6373	ENSG00000169248	CXCL11	4	76033682	76041415
385	3620	ENSG00000131203	IDO1	8	39902275	39928444
384	10537	ENSG00000224654	UBD	CHR_HSCHR6_MHC_MANN_CTG1	29555178	29559492
383	10563	ENSG00000156234	CXCL13	4	77511753	77611834
382	27299	ENSG00000134028	ADAMDEC1	8	24384285	24406013
381	2633	ENSG00000117228	GBP1	1	89052319	89065360
380	115362	ENSG00000154451	GBP5	1	89258950	89272804
379	3002	ENSG00000100453	GZMB	14	24630954	24634267
378	441168	ENSG00000188820	FAM26F	6	116461370	116463779
377	3604	ENSG00000049249	TNFRSF9	1	7915894	7943165
376	3559	ENSG00000134460	IL2RA	10	6010689	6062325
375	80380	ENSG00000197646	PDCD1LG2	9	5510570	5571254
374	56833	ENSG00000158714	SLAMF8	1	159826750	159837249
373	29126	ENSG00000120217	CD274	9	5450503	5470566
372	9447	ENSG00000163568	AIM2	1	159062484	159147096
371	22914	ENSG00000213809	KLRK1	12	10372353	10391874
370	1380	ENSG00000117322	CR2	1	207454230	207489895
369	2208	ENSG00000104921	FCER2	19	7688758	7702146
368	8115	ENSG00000100721	TCL1A	14	95709967	95714196
367	NA	ENSG00000282657	IGHM	CHR_HSCHR14_3_CTG1	105854991	105856989
366	6366	ENSG00000137077	CCL21	9	34709005	34710124
365	6363	ENSG00000172724	CCL19	9	34689567	34691277
364	79368	ENSG00000132704	FCRL2	1	157745733	157777132
363	931	ENSG00000156738	MS4A1	11	60455752	60470760
362	115350	ENSG00000163534	FCRL1	1	157794403	157820105
361	270	ENSG00000116748	AMPD1	1	114673090	114695618
360	115650	ENSG00000159958	TNFRSF13C	22	41922023	41926818
359	29802	ENSG00000128218	VPREB3	22	23752743	23754468
358	930	ENSG00000177455	CD19	16	28931939	28939346
357	3662	ENSG00000137265	IRF4	6	391739	411447
356	974	ENSG00000007312	CD79B	17	63928740	63932354
355	608	ENSG00000048462	TNFRSF17	16	11965107	11968068
354	83416	ENSG00000143297	FCRL5	1	157513377	157552520
353	NA	NA	NA	NA	NA	NA
352	5450	ENSG00000110777	POU2AF1	11	111352252	111455630
351	973	ENSG00000105369	CD79A	19	41877120	41881372
350	4311	ENSG00000196549	MME	3	155024124	155183729
349	5054	ENSG00000106366	SERPINE1	7	101127089	101139266
348	7852	ENSG00000121966	CXCR4	2	136114349	136118165
347	7128	ENSG00000118503	TNFAIP3	6	137867188	137883312
346	3037	ENSG00000170961	HAS2	8	121612116	121641390
345	5806	ENSG00000163661	PTX3	3	157436789	157443628
344	2296	ENSG00000054598	FOXC1	6	1609972	1613897
343	4436	ENSG00000095002	MSH2	2	47402969	47562311
342	2956	ENSG00000116062	MSH6	2	47695530	47810101
341	203068	ENSG00000232575	TUBB	CHR_HSCHR6_MHC_MANN_CTG1	30764859	30770084
340	10926	ENSG00000006634	DBF4	7	87876216	87909541
339	1019	ENSG00000135446	CDK4	12	57747727	57756013
338	9361	ENSG00000196365	LONP1	19	5691834	5720572
337	5426	ENSG00000177084	POLE	12	132623753	132687365
336	5290	ENSG00000121879	PIK3CA	3	179148114	179240093
335	642	ENSG00000108578	BLMH	17	30248195	30292056
334	23239	ENSG00000081913	PHLPP1	18	62715450	62980433
333	7037	ENSG00000072274	TFRC	3	196027183	196082189
332	1948	ENSG00000125266	EFNB2	13	106489731	106535114
331	1021	ENSG00000105810	CDK6	7	92604921	92836594
330	79070	ENSG00000134901	KDELC1	13	102784281	102799007
329	81831	ENSG00000171208	NETO2	16	47077703	47143997
328	374383	ENSG00000188211	NCR3LG1	11	17351726	17377341
327	4237	ENSG00000117122	MFAP2	1	16974502	16980835
326	9315	ENSG00000134986	NREP	5	111662621	111997464
325	9891	ENSG00000074590	NUAK1	12	106063340	106140033
324	2260	ENSG00000077782	FGFR1	8	38411138	38468834
323	7216	ENSG00000067445	TRO	X	54920462	54931431
322	83439	ENSG00000152284	TCF7L1	2	85133410	85310388
321	5569	ENSG00000171033	PKIA	8	78516139	78605267
320	894	ENSG00000118971	CCND2	12	4273772	4305350
319	NA	NA	NA	NA	NA	NA
318	2247	ENSG00000138685	FGF2	4	122826708	122898236
317	3595	ENSG00000081985	IL12RB2	1	67307364	67396900
316	3674	ENSG00000005961	ITGA2B	17	44372180	44389505
315	3592	ENSG00000168811	IL12A	3	159988750	159996019
314	5696	ENSG00000204264	PSMB8	6	32840717	32844703
313	9246	ENSG00000156587	UBE2L6	11	57551656	57568284
312	3659	ENSG00000125347	IRF1	5	132481609	132490798
311	6772	ENSG00000115415	STAT1	2	190964358	191020960
310	6890	ENSG00000168394	TAP1	6	32845209	32853978
309	5698	ENSG00000240065	PSMB9	6	32844136	32859585
308	6891	ENSG00000204267	TAP2	6	32821833	32838780
307	3107	ENSG00000233841	HLA-C	CHR_HSCHR6_MHC_COX_CTG1	31259794	31263175
306	684	ENSG00000130303	BST2	19	17402939	17405648
305	3586	ENSG00000136634	IL10	1	206767602	206772494
304	3310	ENSG00000173110	HSPA6	1	161524540	161526910
303	8784	ENSG00000186891	TNFRSF18	1	1203508	1206691
302	9953	ENSG00000125430	HS3ST3B1	17	14301083	14349404
301	146433	ENSG00000157368	IL34	16	70579895	70660682
300	596	ENSG00000171791	BCL2	18	63123346	63320128
299	64218	ENSG00000196189	SEMA4A	1	156147366	156177752
298	116496	ENSG00000135842	FAM129A	1	184790724	184974550
297	1387	ENSG00000005339	CREBBP	16	3725054	3880726
296	10000	ENSG00000275199	AKT3	CHR_HSCHR1_3_CTG32_1	243488233	243855434
295	2550	ENSG00000237051	GABBR1	CHR_HSCHR6_MHC_MANN_CTG1	29555178	29632716
294	4851	ENSG00000148400	NOTCH1	9	136494444	136545862
293	6794	ENSG00000118046	STK11	19	1177558	1228435
292	6929	ENSG00000071564	TCF3	19	1609290	1652605
291	80325	ENSG00000114626	ABTB1	3	127672935	127680920
290	2534	ENSG00000010810	FYN	6	111660332	111873452
289	79037	ENSG00000213413	PVRIG	7	100218241	100221490
288	5733	ENSG00000050628	PTGER3	1	70852353	71047808
287	4320	ENSG00000099953	MMP11	22	23768226	23784316
286	3880	ENSG00000171345	KRT19	17	41523617	41528308
285	1001	ENSG00000062038	CDH3	16	68636189	68722616
284	9536	ENSG00000148344	PTGES	9	129738331	129753047
283	135250	ENSG00000164520	RAET1E	6	149883375	149898102
282	90853	ENSG00000134668	SPOCD1	1	31790422	31816051
281	3486	ENSG00000146674	IGFBP3	7	45912245	45921874
280	10630	ENSG00000162493	PDPN	1	13583465	13617957
279	7130	ENSG00000123610	TNFAIP6	2	151357592	151380048
278	26872	ENSG00000164647	STEAP1	7	90154375	90164829
277	6624	ENSG00000075618	FSCN1	7	5592823	5606655
276	1956	ENSG00000146648	EGFR	7	55019021	55211628
275	7039	ENSG00000163235	TGFA	2	70447280	70554193
274	301	ENSG00000135046	ANXA1	9	73151757	73170393
273	1839	ENSG00000113070	HBEGF	5	140332843	140346631
272	4609	ENSG00000136997	MYC	8	127735434	127741434
271	7056	ENSG00000178726	THBD	20	23045633	23049741
270	9610	ENSG00000174791	RIN1	11	66330242	66336840
269	6382	ENSG00000115884	SDC1	2	20200797	20225433
268	3707	ENSG00000143772	ITPKB	1	226631690	226739323
267	57447	ENSG00000165795	NDRG2	14	21016763	21070872
266	10855	ENSG00000173083	HPSE	4	83292461	83335153
265	2308	ENSG00000150907	FOXO1	13	40469953	40666597
264	5583	ENSG00000027075	PRKCH	14	61187559	61550976
263	2309	ENSG00000118689	FOXO3	6	108559835	108684774
262	NA	NA	NA	NA	NA	NA
261	NA	NA	NA	NA	NA	NA
260	1026	ENSG00000124762	CDKN1A	6	36676460	36687339
259	2355	ENSG00000075426	FOSL2	2	28392448	28417312
258	9935	ENSG00000204103	MAFB	20	40685848	40689240
257	960	ENSG00000026508	CD44	11	35138870	35232402
256	7040	ENSG00000105329	TGFB1	19	41301587	41353911
255	NA	NA	NA	NA	NA	NA
254	8572	ENSG00000131435	PDLIM4	5	132257671	132273454
253	79465	ENSG00000131019	ULBP3	6	150063150	150069095
252	5366	ENSG00000141682	PMAIP1	18	59899948	59904306
251	3759	ENSG00000123700	KCNJ2	17	70168673	70180048
250	3480	ENSG00000140443	IGF1R	15	98648971	98964530
249	4082	ENSG00000277443	MARCKS	6	113857362	113863471
248	8190	ENSG00000261857	MIA	19	40771648	40777490
247	3429	ENSG00000275214	IFI27	CHR_HSCHR14_7_CTG1	94104836	94116698
246	3433	ENSG00000119922	IFIT2	10	89283694	89309276
245	9636	ENSG00000187608	ISG15	1	1001138	1014541
244	3434	ENSG00000185745	IFIT1	10	89392546	89406486
243	4233	ENSG00000105976	MET	7	116672390	116798386
242	NA	NA	NA	NA	NA	NA
241	5468	ENSG00000132170	PPARG	3	12287368	12434356
240	8744	ENSG00000125657	TNFSF9	19	6530999	6535928
239	170482	ENSG00000198178	CLEC4C	12	7729415	7751605
238	6367	ENSG00000102962	CCL22	16	57358772	57366190
237	1437	ENSG00000164400	CSF2	5	132073790	132076170
236	2099	ENSG00000091831	ESR1	6	151656691	152129619
235	11343	ENSG00000074416	MGLL	3	127689062	127823250
234	3383	ENSG00000090339	ICAM1	19	10270835	10286615
233	1154	ENSG00000114737	CISH	3	50606490	50611831
232	4360	ENSG00000260314	MRC1	10	17809344	17911170
231	55640	ENSG00000119686	FLVCR2	14	75578617	75663214
230	5732	ENSG00000125384	PTGER2	14	52314305	52328606
229	4973	ENSG00000173391	OLR1	12	10158301	10172138
228	54209	ENSG00000095970	TREM2	6	41158506	41163186
227	11027	ENSG00000274000	LILRA2	CHR_HSCHR19LRC_COX1_CTG3_1	54504943	54519583
226	7098	ENSG00000164342	TLR3	4	186069152	186088069
225	3574	ENSG00000104432	IL7	8	78675743	78805523
224	1524	ENSG00000168329	CX3CR1	3	39263494	39281735
223	911	ENSG00000158481	CD1C	1	158289786	158293630
222	30812	ENSG00000005513	SOX8	16	981808	986979
221	970	ENSG00000125726	CD70	19	6583183	6604103
220	926	ENSG00000172116	CD8B	2	86815339	86861924
219	2625	ENSG00000107485	GATA3	10	8053604	8075198
218	5026	ENSG00000083454	P2RX5	17	3672199	3696404
217	259197	ENSG00000236315	NCR3	CHR_HSCHR6_MHC_APD_CTG1	31655881	31659971
216	115352	ENSG00000160856	FCRL3	1	157674321	157700857
215	NA	ENSG00000128438	TBC1D27	17	16922915	16934839
214	640	ENSG00000136573	BLK	8	11494001	11564604
213	643	ENSG00000160683	CXCR5	11	118883766	118897799
212	933	ENSG00000012124	CD22	19	35319261	35347355
211	199786	ENSG00000167483	FAM129C	19	17523301	17553839
210	91937	ENSG00000145850	TIMD4	5	156919282	156963255
209	8320	ENSG00000163508	EOMES	3	27715949	27722711
208	NA	NA	NA	NA	NA	NA
207	2841	ENSG00000125245	GPR18	13	99254714	99261744
206	4049	ENSG00000238130	LTA	CHR_HSCHR6_MHC_COX_CTG1	31559460	31561730
205	NA	NA	NA	NA	NA	NA
204	9437	ENSG00000278362	NCR1	CHR_HSCHR19LRC_COX2_CTG3_1	54576966	54586961
203	59067	ENSG00000138684	IL21	4	122612628	122621069
202	3805	ENSG00000277076	KIR2DL4	CHR_HSCHR19KIR_G085_BA1_HAP_CTG3_1	54789863	54800933
201	3802	ENSG00000278821	KIR2DL1	CHR_HSCHR19KIR_G248_A_HAP_CTG3_1	54769815	54784318
200	3001	ENSG00000145649	GZMA	5	55102648	55110252
199	6352	ENSG00000274233	CCL5	CHR_HSCHR17_7_CTG4	35871491	35880793
198	4818	ENSG00000105374	NKG7	19	51371606	51372715
197	5551	ENSG00000180644	PRF1	10	70597348	70602775
196	3902	ENSG00000089692	LAG3	12	6772512	6778455
195	925	ENSG00000153563	CD8A	2	86784610	86808396
194	2999	ENSG00000100450	GZMH	14	24606480	24609699
193	356	ENSG00000117560	FASLG	1	172659018	172666874
192	3458	ENSG00000111537	IFNG	12	68154768	68159747
191	10578	ENSG00000115523	GNLY	2	85685175	85698854
190	3822	ENSG00000205809	KLRC2	12	10426854	10442300
189	3821	ENSG00000134545	KLRC1	12	10442264	10454685
188	3823	ENSG00000205810	KLRC3	12	10412312	10420595
187	3824	ENSG00000134539	KLRD1	12	10226058	10329600
186	6347	ENSG00000108691	CCL2	17	34255218	34257203
185	3553	ENSG00000125538	IL1B	2	112829751	112836903
184	7124	ENSG00000228978	TNF	CHR_HSCHR6_MHC_APD_CTG1	31643520	31645322
183	1116	ENSG00000133048	CHI3L1	1	203178931	203186749
182	6999	ENSG00000151790	TDO2	4	155854738	155920406
181	4318	ENSG00000100985	MMP9	20	46008908	46016561
180	64167	ENSG00000164308	ERAP2	5	96875939	96919716
179	4033	ENSG00000118308	LRMP	12	25004342	25108334
178	57823	ENSG00000026751	SLAMF7	1	160739057	160754821
177	939	ENSG00000139193	CD27	12	6444867	6451718
176	4063	ENSG00000122224	LY9	1	160796074	160828261
175	81030	ENSG00000124256	ZBP1	20	57603846	57620576
174	3112	ENSG00000241106	HLA-DOB	6	32812763	32817048
173	3695	ENSG00000139626	ITGB7	12	53191318	53207307
172	55024	ENSG00000153064	BANK1	4	101411286	102074812
171	64174	ENSG00000167261	DPEP2	16	67987394	68000586
170	26228	ENSG00000035720	STAP1	4	67558728	67607337
169	54106	ENSG00000239732	TLR9	3	52221080	52226163
168	29909	ENSG00000174946	GPR171	3	151197832	151203201
167	1235	ENSG00000112486	CCR6	6	167111807	167139696
166	959	ENSG00000102245	CD40LG	X	136648193	136660390
165	1233	ENSG00000183813	CCR4	3	32951574	32956349
164	151888	ENSG00000186265	BTLA	3	112463968	112499561
163	1236	ENSG00000126353	CCR7	17	40553769	40565472
162	10219	ENSG00000139187	KLRG1	12	8950044	9010760
161	197135	ENSG00000282077	PATL2	CHR_HSCHR15_3_CTG8	44711032	44711328
160	NA	NA	NA	NA	NA	NA
159	154075	ENSG00000164483	SAMD3	6	130144315	130365425
158	10666	ENSG00000150637	CD226	18	69831158	69961803
157	51744	ENSG00000122223	CD244	1	160830160	160862855
156	219972	ENSG00000197629	MPEG1	11	59208510	59212951
155	2113	ENSG00000134954	ETS1	11	128458761	128587558
154	5175	ENSG00000261371	PECAM1	17	64319415	64413776
153	3936	ENSG00000136167	LCP1	13	46125920	46211871
152	2123	ENSG00000126860	EVI2A	17	31317560	31321884
151	6775	ENSG00000138378	STAT4	2	191029576	191151596
150	3575	ENSG00000168685	IL7R	5	35852695	35879603
149	355	ENSG00000026103	FAS	10	88990582	89015785
148	834	ENSG00000137752	CASP1	11	105025443	105035250
147	64127	ENSG00000167207	NOD2	16	50693603	50734041
146	958	ENSG00000101017	CD40	20	46118272	46129863
145	5742	ENSG00000095303	PTGS1	9	122370530	122395703
144	4065	ENSG00000054219	LY75	2	159803355	159904749
143	10437	ENSG00000216490	IFI30	19	18173162	18178117
142	7805	ENSG00000162511	LAPTM5	1	30732469	30757820
141	1318	ENSG00000136867	SLC31A2	9	113150942	113164137
140	51177	ENSG00000023902	PLEKHO1	1	150149183	150164720
139	140885	ENSG00000198053	SIRPA	20	1894167	1940592
138	728	ENSG00000197405	C5AR1	19	47290023	47322066
137	58475	ENSG00000166927	MS4A7	11	60378482	60395951
136	128346	ENSG00000143110	C1orf162	1	111473792	111478512
135	4481	ENSG00000038945	MSR1	8	16107878	16567490
134	2212	ENSG00000143226	FCGR2A	1	161505430	161524013
133	29992	ENSG00000085514	PILRA	7	100367530	100400099
132	2214	ENSG00000203747	FCGR3A	1	161541759	161550737
131	NA	NA	NA	NA	NA	NA
130	84868	ENSG00000135077	HAVCR2	5	157085832	157142869
129	942	ENSG00000114013	CD86	3	122055366	122121139
128	7941	ENSG00000146070	PLA2G7	6	46704201	46735693
127	1435	ENSG00000184371	CSF1	1	109910242	109930992
126	941	ENSG00000121594	CD80	3	119524293	119559602
125	8564	ENSG00000117009	KMO	1	241532134	241595642
124	597	ENSG00000140379	BCL2A1	15	79960889	79971446
123	2357	ENSG00000171051	FPR1	19	51745172	51804110
122	1378	ENSG00000203710	CR1	1	207496147	207640647
121	330	ENSG00000023445	BIRC3	11	102317450	102339403
120	5920	ENSG00000133321	RARRES3	11	63536809	63546462
119	6348	ENSG00000274221	CCL3	CHR_HSCHR17_7_CTG4	36088598	36090511
118	6351	ENSG00000275824	CCL4	CHR_HSCHR17_7_CTG4	36103979	36106010
117	3606	ENSG00000150782	IL18	11	112143251	112164117
116	150372	ENSG00000235568	NFAM1	22	42380410	42432395
115	9332	ENSG00000177575	CD163	12	7470813	7503893
114	6614	ENSG00000088827	SIGLEC1	20	3686970	3707128
113	4688	ENSG00000116701	NCF2	1	183555563	183590876
112	3684	ENSG00000169896	ITGAM	16	31259990	31332892
111	3101	ENSG00000160883	HK3	5	176880869	176899332
110	10288	ENSG00000274513	LILRB2	CHR_HSCHR19LRC_PGF2_CTG3_1	54274450	54281944
109	64092	ENSG00000155307	SAMSN1	21	14485228	14583402
108	NA	NA	NA	NA	NA	NA
107	NA	NA	NA	NA	NA	NA
106	3687	ENSG00000140678	ITGAX	16	31355134	31382997
105	9056	ENSG00000155465	SLC7A7	14	22773222	22829820
104	1536	ENSG00000165168	CYBB	X	37780011	37813461
103	920	ENSG00000010610	CD4	12	6786858	6820808
102	7940	ENSG00000235915	LST1	CHR_HSCHR6_MHC_APD_CTG1	31653110	31655895
101	5724	ENSG00000169403	PTAFR	1	28147166	28193936
100	3903	ENSG00000278154	LAIR1	CHR_HSCHR19LRC_PGF2_CTG3_1	54361220	54378234
99	6688	ENSG00000066336	SPI1	11	47354860	47378576
98	2207	ENSG00000158869	FCER1G	1	161215234	161220699
97	968	ENSG00000129226	CD68	17	7579467	7582113
96	51296	ENSG00000110446	SLC15A3	11	60937084	60952530
95	2359	ENSG00000187474	FPR3	19	51795163	51826189
94	114548	ENSG00000162711	NLRP3	1	247416156	247449108
93	945	ENSG00000105383	CD33	19	51225064	51243860
92	30835	ENSG00000090659	CD209	19	7739994	7747564
91	283316	ENSG00000177675	CD163L1	12	7346685	7479897
90	160364	ENSG00000172322	CLEC12A	12	9951316	9995694
89	2209	ENSG00000150337	FCGR1A	1	149782671	149792518
88	971	ENSG00000137101	CD72	9	35609533	35646810
87	2210	ENSG00000198019	FCGR1B	1	121087345	121096310
86	51348	ENSG00000150045	KLRF1	12	9827481	9845007
85	1441	ENSG00000119535	CSF3R	1	36466043	36483278
84	8875	ENSG00000112303	VNN2	6	132743870	132763459
83	6403	ENSG00000174175	SELP	1	169588849	169630193
82	2219	ENSG00000085265	FCN1	9	134905890	134917963
81	10462	ENSG00000132514	CLEC10A	17	7074537	7080307
80	8764	ENSG00000273936	TNFRSF14	CHR_HSCHR1_1_CTG3	2555639	2565622
79	10384	ENSG00000111801	BTN3A3	6	26440472	26453415
78	7456	ENSG00000115935	WIPF1	2	174559572	174682916
77	7133	ENSG00000028137	TNFRSF1B	1	12167003	12209228
76	3676	ENSG00000115232	ITGA4	2	181457202	181536187
75	9839	ENSG00000169554	ZEB2	2	144364364	144524583
74	7185	ENSG00000056558	TRAF1	9	120902393	120929173
73	3717	ENSG00000096968	JAK2	9	4984390	5128183
72	5734	ENSG00000171522	PTGER4	5	40679498	40693735
71	3965	ENSG00000168961	LGALS9	17	27629798	27649560
70	9034	ENSG00000121797	CCRL2	3	46407163	46412997
69	4261	ENSG00000179583	CIITA	16	10866222	10932281
68	969	ENSG00000110848	CD69	12	9752486	9760901
67	3603	ENSG00000172349	IL16	15	81159575	81314058
66	695	ENSG00000010671	BTK	X	101349447	101390796
65	9595	ENSG00000115165	CYTIP	2	157414619	157488961
64	6503	ENSG00000155926	SLA	8	133036724	133103054
63	951	ENSG00000104894	CD37	19	49335171	49343335
62	3394	ENSG00000140968	IRF8	16	85898803	85922609
61	55843	ENSG00000075884	ARHGAP15	2	143091362	143768352
60	912	ENSG00000158473	CD1D	1	158179947	158184896
59	NA	NA	NA	NA	NA	NA
58	84106	ENSG00000133246	PRAM1	19	8490056	8503112
57	115727	ENSG00000171777	RASGRP4	19	38409051	38426305
56	11025	ENSG00000274587	LILRB3	CHR_HSCHR19_4_CTG3_1	54217271	54223706
55	3055	ENSG00000101336	HCK	20	32052188	32101856
54	1439	ENSG00000100368	CSF2RB	22	36913628	36940449
53	84433	ENSG00000198286	CARD11	7	2906141	3043945
52	5729	ENSG00000168229	PTGDR	14	52267713	52276724
51	60489	ENSG00000239713	APOBEC3G	22	39077005	39087743
50	200316	ENSG00000128394	APOBEC3F	22	39040604	39053910
49	22861	ENSG00000091592	NLRP1	17	5499427	5619424
48	9308	ENSG00000112149	CD83	6	14117256	14136918
47	6850	ENSG00000165025	SYK	9	90801787	90898549
46	7097	ENSG00000137462	TLR2	4	153701500	153705699
45	55803	ENSG00000184060	ADAP2	17	30906344	30959322
44	7099	ENSG00000136869	TLR4	9	117704332	117716871
43	1436	ENSG00000182578	CSF1R	5	150053291	150113372
42	929	ENSG00000170458	CD14	5	140631728	140633701
41	23166	ENSG00000010327	STAB1	3	52495338	52524495
40	3561	ENSG00000147168	IL2RG	X	71107404	71112108
39	5778	ENSG00000143851	PTPN7	1	202147013	202161588
38	84636	ENSG00000147138	GPR174	X	79170972	79172229
37	10225	ENSG00000153283	CD96	3	111292719	111665750
36	919	ENSG00000198821	CD247	1	167430640	167518610
35	3932	ENSG00000182866	LCK	1	32251239	32286165
34	923	ENSG00000013725	CD6	11	60971680	61020377
33	914	ENSG00000116824	CD2	1	116754385	116769228
32	3003	ENSG00000113088	GZMK	5	55024253	55034570
31	50852	ENSG00000163519	TRAT1	3	108822698	108855005
30	962	ENSG00000117091	CD48	1	160678746	160711851
29	3702	ENSG00000113263	ITK	5	157142933	157255191
28	917	ENSG00000160654	CD3G	11	118344344	118355161
27	915	ENSG00000167286	CD3D	11	118338954	118342744
26	916	ENSG00000198851	CD3E	11	118304545	118316175
25	1234	ENSG00000160791	CCR5	3	46370854	46376206
24	3560	ENSG00000100385	IL2RB	22	37125838	37175054
23	50615	ENSG00000103522	IL21R	16	27402162	27452042
22	201633	ENSG00000181847	TIGIT	3	114276913	114310288
21	3820	ENSG00000111796	KLRB1	12	9594551	9607886
20	940	ENSG00000178562	CD28	2	203706475	203738912
19	5588	ENSG00000065675	PRKCQ	10	6427143	6580301
18	29851	ENSG00000163600	ICOS	2	203936748	203961577
17	1493	ENSG00000163599	CTLA4	2	203867786	203873960
16	7293	ENSG00000186827	TNFRSF4	1	1211326	1214138
15	50943	ENSG00000049768	FOXP3	X	49250436	49264826
14	5133	ENSG00000276977	PDCD1	CHR_HSCHR2_3_CTG15	241849881	241858908
13	30009	ENSG00000073861	TBX21	17	47733244	47746119
12	55340	ENSG00000196329	GIMAP5	7	150722253	150750033
11	3594	ENSG00000096996	IL12RB1	19	18058995	18098944
10	924	ENSG00000173762	CD7	17	82314868	82317602
9	197358	ENSG00000167984	NLRC3	16	3539033	3577400
8	2833	ENSG00000186810	CXCR3	X	71615916	71618517
7	149628	ENSG00000163564	PYHIN1	1	158930796	158977054
6	11184	ENSG00000104814	MAP4K1	19	38587641	38618882
5	64926	ENSG00000105122	RASAL3	19	15451624	15464571
4	7535	ENSG00000115085	ZAP70	2	97713560	97739862
3	3683	ENSG00000005844	ITGAL	16	30472658	30523185
2	22806	ENSG00000161405	IKZF3	17	39757715	39864188
1	5790	ENSG00000213402	PTPRCAP	11	67435510	67438067
